# Supplementary material for: A facile and versatile preparation of bilindiones and biladienones from tetraarylporphyrins
Source: Royal Society of Chemistry journal article supplement (doi:10.1039/b414299c), 2005-01-01
Supplement: b414299c-1.pdf [file b414299c-1.pdf]

## Electronic Supplementary Information 1

### A Facile and Versatile Preparation of Bilindiones and Biladienones from Tetraarylporphyrins

Takae Yamauchi,<sup>a</sup> Tadashi Mizutani,<sup>\*,b</sup> Kenji Wada,<sup>a</sup> Shoji Horii,<sup>b</sup> Hiroataka Furukawa,<sup>a</sup>  
Shigeyuki Masaoka,<sup>a</sup> Ho-Chol Chang,<sup>a</sup> and Susumu Kitagawa<sup>a</sup>

<sup>a</sup> Department of Synthetic Chemistry and Biological Chemistry, Graduate School of Engineering, Kyoto University, Kyotodaigaku-katsura, Nishikyo-ku, Kyoto 615-8510 Japan

<sup>b</sup> Department of Molecular Science and Technology, Faculty of Engineering, Doshisha University, Kyotanabe, Kyoto 610-0321 Japan.

#### Coupled Oxidation of *meso*-Tetraarylporphyrin

A solution of [FeCl (TPP)] (100 mg) in pyridine (6 mL) was added to oxygen-saturated chloroform (50 mL) immediately followed by the addition of solid *L*- (+)-ascorbic acid (500 mg). After stirring at room temperature for 30 min, the solution was filtered. The brown filtrate was washed with water, dried over Na<sub>2</sub>SO<sub>4</sub>, filtered and concentrated *in vacuo*. The resulting brown residue was dissolved in pyridine (2.5 mL) and was cooled in an ice bath. Then a solution of NaBF<sub>4</sub> (1.22M aq., 25 mL) was added. After stirring for 1h, the dark green precipitate was collected by filtration and washed with water. This product was dissolved in acetone (50 mL) and then 1M HCl (10 mL) was added and the resulting solution was stirred for 1h at room temperature in the dark. The mixture was poured into ice water (150 mL) and extracted with CH<sub>2</sub>Cl<sub>2</sub> (100 mL × 3). The combined organic extracts were washed with water (100 mL × 3) and dried over Na<sub>2</sub>SO<sub>4</sub>. Evaporation of the solvent and separation by column chromatography (SiO<sub>2</sub>, CH<sub>2</sub>Cl<sub>2</sub>/acetone = 19/1) afforded a purple solid of **1** (64.7 mg, 70 %) and a red solid of **2** (13.9 mg, 15 %).

**Biladienone (1).** <sup>1</sup>H NMR (CDCl<sub>3</sub>) δ 6.11 (m, 3H), 6.14 (d, 1H, *J* = 5 Hz), 6.28 (s, 1H), 6.44 (d, 1H, *J* = 4 Hz), 6.72 (d, 1H, *J* = 5 Hz), 6.78 (dd, 1H, *J* = 6.5, *J* = 2.5 Hz), 6.83 (d, 1H, *J* = 5.5 Hz), 7.29-7.47 (m, 18H), 7.81 (d, 2H, *J* = 9 Hz), 9.87 (br s, 1H), 10.75 (br s, 1H), 12.46 (br s, 1H); UV-vis (CHCl<sub>3</sub>) λ<sub>max</sub> 348, 562 nm; MS (FAB) *m/z*, 664 ([M]<sup>+</sup>), 647 ([M-OH]<sup>+</sup>)

**Biladienone (2).** <sup>1</sup>H NMR (CD<sub>2</sub>Cl<sub>2</sub>) δ 6.07 (dd, 1H *J* = 3.5, *J* = 2.8 Hz), 6.24 (dd, 1H *J* = 5.7, *J* = 1.8 Hz), 6.32 (d, 1H *J* = 4.3 Hz), 6.40 (d, 1H *J* = 4 Hz), 6.50 (d, 1H *J* = 4.3 Hz), 6.68 (d, 1H, *J* = 4.3 Hz), 6.80 (dd, 1H *J* = 4.0, *J* = 2.8 Hz), 7.20 (s, 1H) 7.34-7.57 (m, 18H), 7.74 (dd, 1H, *J* = 5.7, *J* = 1.8 Hz), 9.78 (s, 1H), 10.86 (br s, 1H); <sup>13</sup>C NMR (CDCl<sub>3</sub>) δ 76 (sp<sup>3</sup>), 111-145 (sp<sup>2</sup>), 171, 185 (carbonyl); UV-vis (CHCl<sub>3</sub>) λ<sub>max</sub> 315, 358, 532 nm; MS (FAB) *m/z*, 665 ([M+H]<sup>+</sup>), 647 ([M-OH]<sup>+</sup>). HRMS (FAB) ([M]<sup>+</sup>) *m/z*, Calcd for C<sub>44</sub>H<sub>33</sub>N<sub>4</sub>O<sub>3</sub> 665.2553, found 665.2547.

**Coupled Oxidation of TPP at High Temperature.**

The reaction was carried out under the condition of refluxing in chloroform for 1.5 hr. Except for the reaction temperature and reaction time, the procedure was the same as the reaction at room temperature.

**Bilindione (3).** Yield 23 %.  $^1\text{H}$  NMR ( $\text{CD}_2\text{Cl}_2$ )  $\delta$ (ppm) 6.21 (d, 2H,  $J = 5.5$  Hz) 6.51 (d, 2H,  $J = 4.4$  Hz) 6.75 (d, 2H,  $J = 4.4$  Hz) 7.00 (d, 2H,  $J = 5.5$  Hz) 7.38 (m, 10H) 7.53 (m, 5H) 8.14 (br s, 2H) 12.0 (br s, 1H);  $^{13}\text{C}$  NMR ( $\text{CDCl}_3$ )  $\delta$  114-139( $\text{sp}^2$ ), 167 (carbonyl); UV-vis ( $\text{CHCl}_3$ )  $\lambda_{\text{max}}$  334, 400, 616 nm; HRMS (FAB) ( $[\text{M}]^+$ )  $m/z$ , calcd for  $\text{C}_{37}\text{H}_{26}\text{N}_4\text{O}_2$  558.2056, found 558.2053.

**Bilindione (4).** Yield 23 %.  $^1\text{H}$  NMR ( $\text{CD}_2\text{Cl}_2$ )  $\delta$  6.09 (dd, 1H,  $J = 5.8$  Hz,  $J = 1.5$  Hz), 6.25 (dd, 1H,  $J = 5.8$  Hz,  $J = 1.5$  Hz), 6.30 (d,  $J = 4.3$  Hz), 6.43 (d, 1H,  $J = 4.3$  Hz) 6.61 (d, 1H,  $J = 4.3$  Hz), 6.74 (d, 1H,  $J = 4.3$  Hz), 7.00 (dd, 1H,  $J = 5.5$  Hz,  $J = 1.2$  Hz), 7.1 (br s, 1H), 7.3-7.5 (m, 15H), 7.58 (dd, 1H,  $J = 8.3$ ,  $J = 1.6$  Hz), 9.11 (s, 1H), 12.35 (br s, 1H); UV-vis ( $\text{CHCl}_3$ )  $\lambda_{\text{max}}$  332, 400, 612 nm; MS (FAB)  $m/z$ , ( $[\text{M}]^+$ ) 558. HRMS (FAB) ( $[\text{M}]^+$ )  $m/z$ , Calcd for  $\text{C}_{37}\text{H}_{26}\text{N}_4\text{O}_2$  558.2055, found 558.2070.

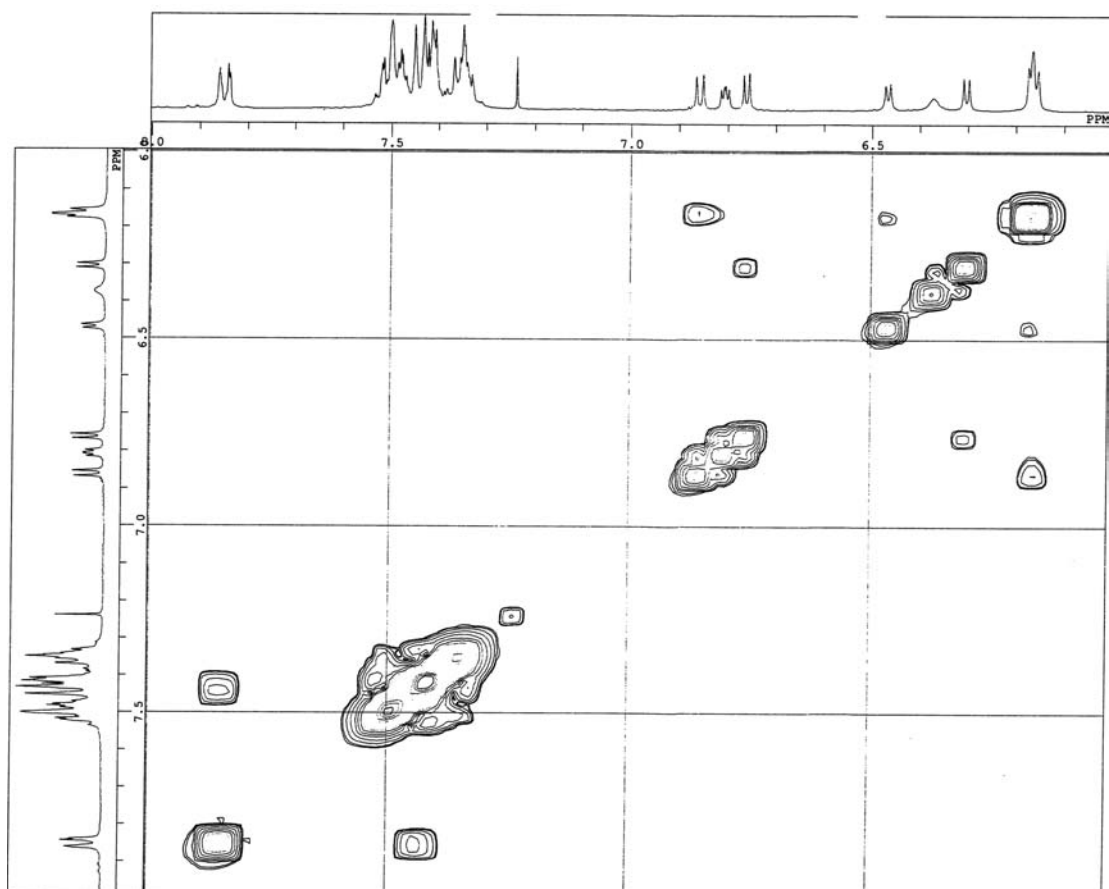

Figure S1.  $^1\text{H}$ - $^1\text{H}$  COSY of **1** ( $\text{CDCl}_3$ )

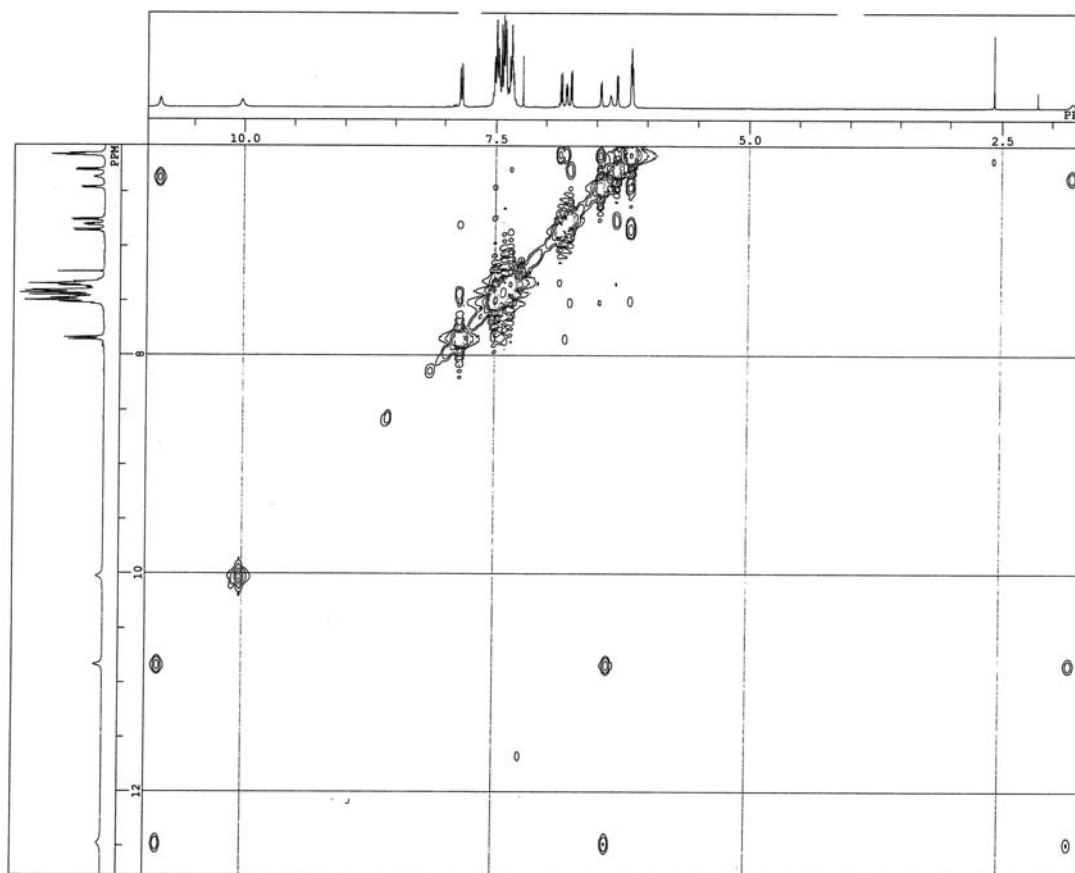

Figure S2. NOESY of 1 (CDCl<sub>3</sub>)

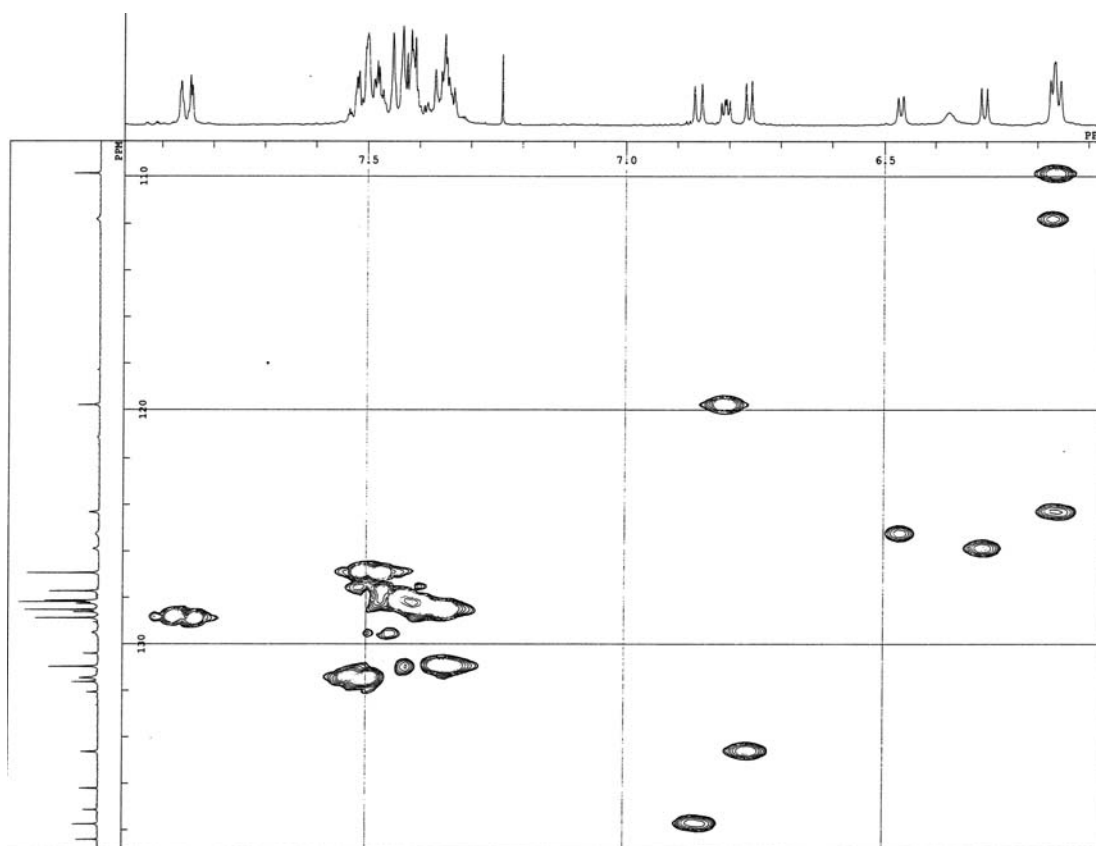

Figure S3. HMQC of **1** (CDCl<sub>3</sub>)

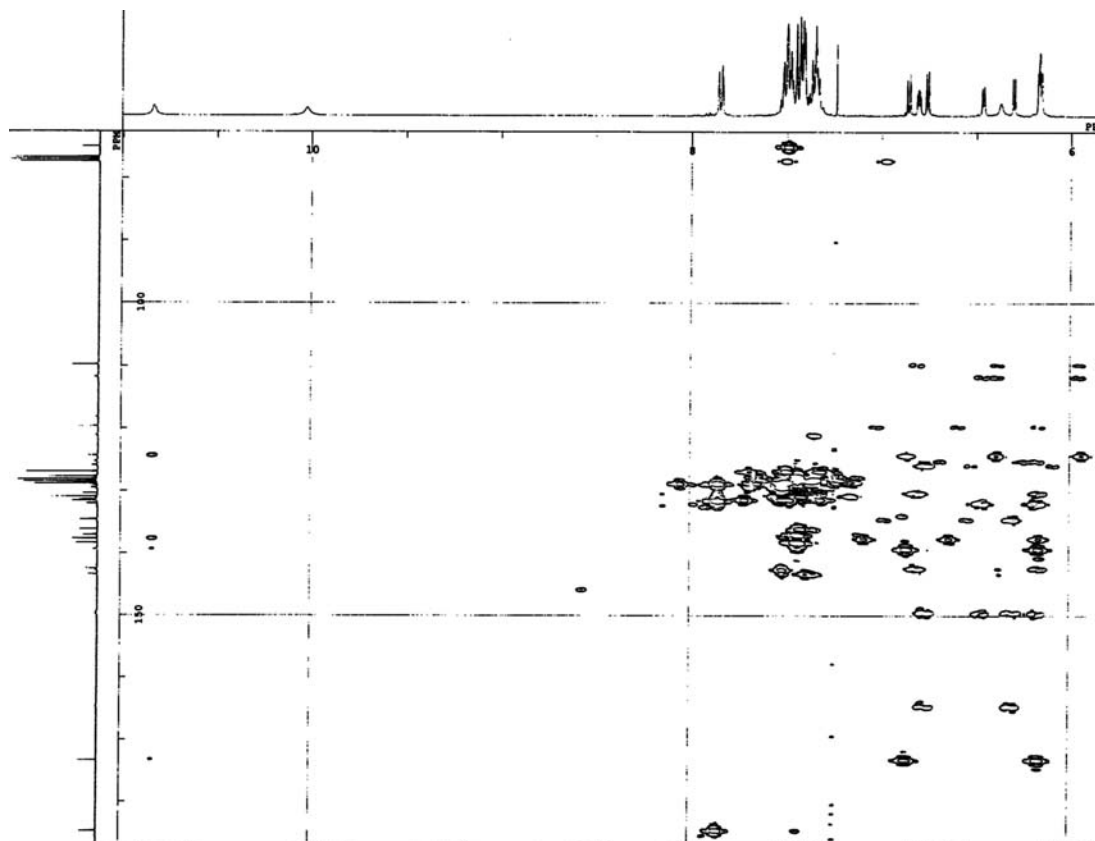

Figure S4. HMBC of 1 (CDCl<sub>3</sub>)
