# Supplementary material for: A facile and versatile preparation of bilindiones and biladienones from tetraarylporphyrins
Source: Royal Society of Chemistry journal article supplement (doi:10.1039/b414299c), 2005-01-01
Supplement: b414299c-2.pdf [file b414299c-2.pdf]

## Electronic Supplementary Information 2

### A Facile and Versatile Preparation of Bilindiones and Biladienones from Tetraarylporphyrins

Takae Yamauchi,<sup>a</sup> Tadashi Mizutani,<sup>a,b</sup> Kenji Wada,<sup>a</sup> Shoji Horii,<sup>b</sup> Hiroataka Furukawa,<sup>a</sup>  
Shigeyuki Masaoka,<sup>a</sup> Ho-Chol Chang,<sup>a</sup> and Susumu Kitagawa<sup>a</sup>

<sup>a</sup> Department of Synthetic Chemistry and Biological Chemistry, Graduate School of Engineering, Kyoto University, Kyotodaigaku-katsura, Nishikyo-ku, Kyoto 615-8510 Japan

<sup>b</sup> Department of Molecular Science and Technology, Faculty of Engineering, Doshisha University, Kyotanabe, Kyoto 610-0321 Japan.

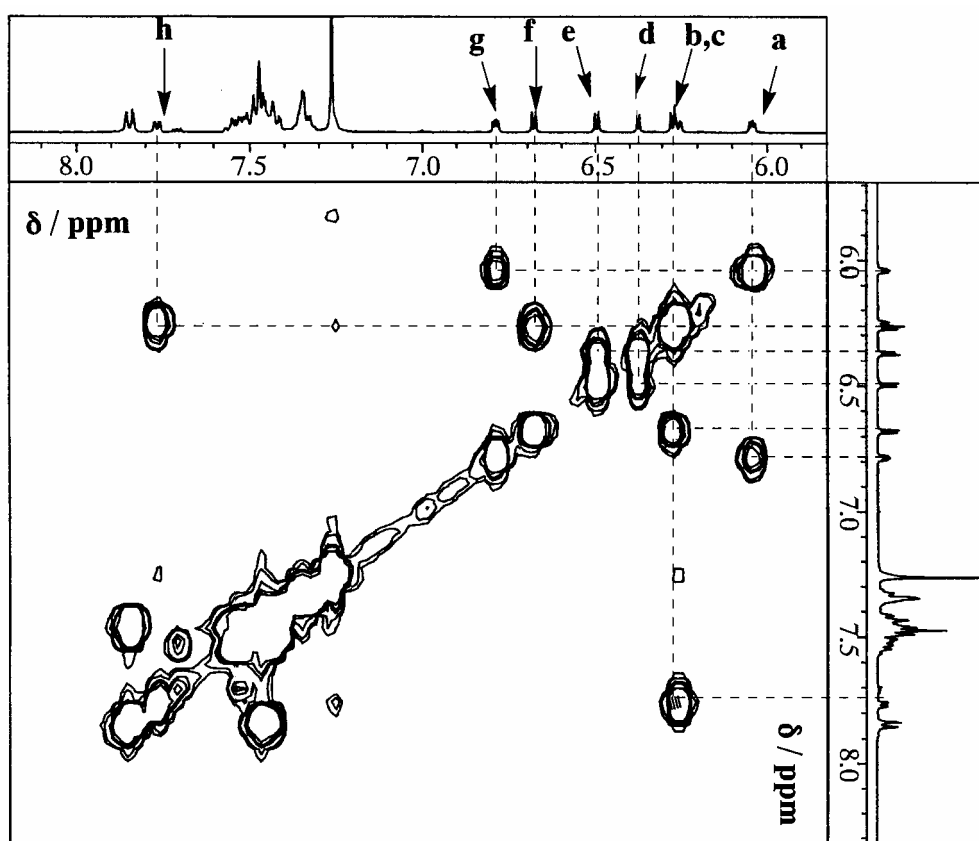

Figure S5.  $^1\text{H}$ - $^1\text{H}$  COSY of **2** ( $\text{CDCl}_3$ )

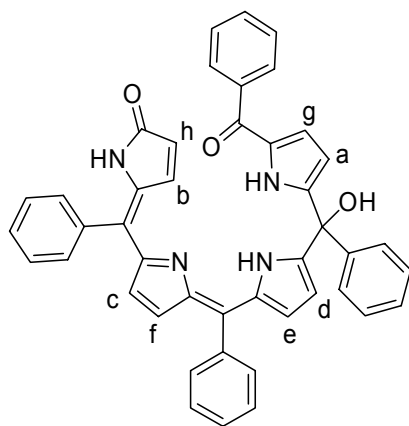

**Table S1.**  $\beta$ -protons and NH protons in the  $^1\text{H}$  NMR spectra of **1** and **2** ( $\text{CDCl}_3$ )

|               | <b>1</b>  | <b>2</b>  | $\Delta\delta(\mathbf{1-2})$ |
|---------------|-----------|-----------|------------------------------|
| H-2           | 6.11 (m)  | 6.24 (dd) | -0.13                        |
| H-3           | 6.83 (d)  | 7.74 (dd) | -0.91                        |
| H-7           | 6.14 (d)  | 6.32 (d)  | -0.18                        |
| H-8           | 6.72 (d)  | 6.68 (d)  | 0.04                         |
| H-12          | 6.44 (d)  | 6.50 (d)  | -0.06                        |
| H-13          | 6.11 (m)  | 6.40 (d)  | -0.29                        |
| H-17          | 6.11 (m)  | 6.07 (dd) | 0.04                         |
| H-18          | 6.78 (dd) | 6.80 (dd) | -0.02                        |
| NH ring A     | 10.75     | 7.2       | 3.55                         |
| NH ring D     | 9.87      | 9.78      | 0.09                         |
| NH ring B + C | 12.46     | 10.86     | 1.6                          |

$\Delta\delta(\mathbf{1-2})$  is smaller than 0.25 except for H-3, H-13,  $\text{NH}_\text{A}$ , and  $\text{NH}_{\text{B+C}}$ . A similar trend was observed for  $^1\text{H}$  NMR spectra of *ZZ*- and *ZE-meso*-butylbiladienone.

**Table S2.** C-13 signals assigned by HMQC and HMBC of **1** and **2** (CDCl<sub>3</sub>)

| Protons | $\delta$ , ppm (multiplicity) |          |                                         |
|---------|-------------------------------|----------|-----------------------------------------|
|         | <b>1</b> <sup>a</sup>         | <b>2</b> | $\Delta\delta(\mathbf{1} - \mathbf{2})$ |
| C-1     | 173.2                         |          |                                         |
| C-2     | 124.4                         | 125.7    | -1.3                                    |
| C-3     | 137.7                         | 127.2    | +10.5                                   |
| C-4     | 139.4                         |          |                                         |
| C-5     | 121.3 <sup>a</sup>            |          |                                         |
| C-6     | 164.6                         |          |                                         |
| C-7     | 125.9                         | 120.7    | +5.2                                    |
| C-8     | 134.6                         | 134.5    | +0.1                                    |
| C-9     | 149.6                         |          |                                         |
| C-10    | 142.7 <sup>a</sup>            |          |                                         |
| C-11    | 132.1                         |          |                                         |
| C-12    | 125.3                         | 126.3    | -1.0                                    |
| C-13    | 111.3                         | 117.9    | -6.6                                    |
| C-14    | 149.7                         |          |                                         |
| C-15    | 76.7                          |          |                                         |
| C-16    | 142.5                         |          |                                         |
| C-17    | 109.9                         | 110.5    | -0.6                                    |
| C-18    | 119.8                         | 119.5    | +0.3                                    |
| C-19    | 130.4                         |          |                                         |
| C-20    | 184.6                         |          |                                         |

<sup>a</sup> Taken from the literature (ref 10).

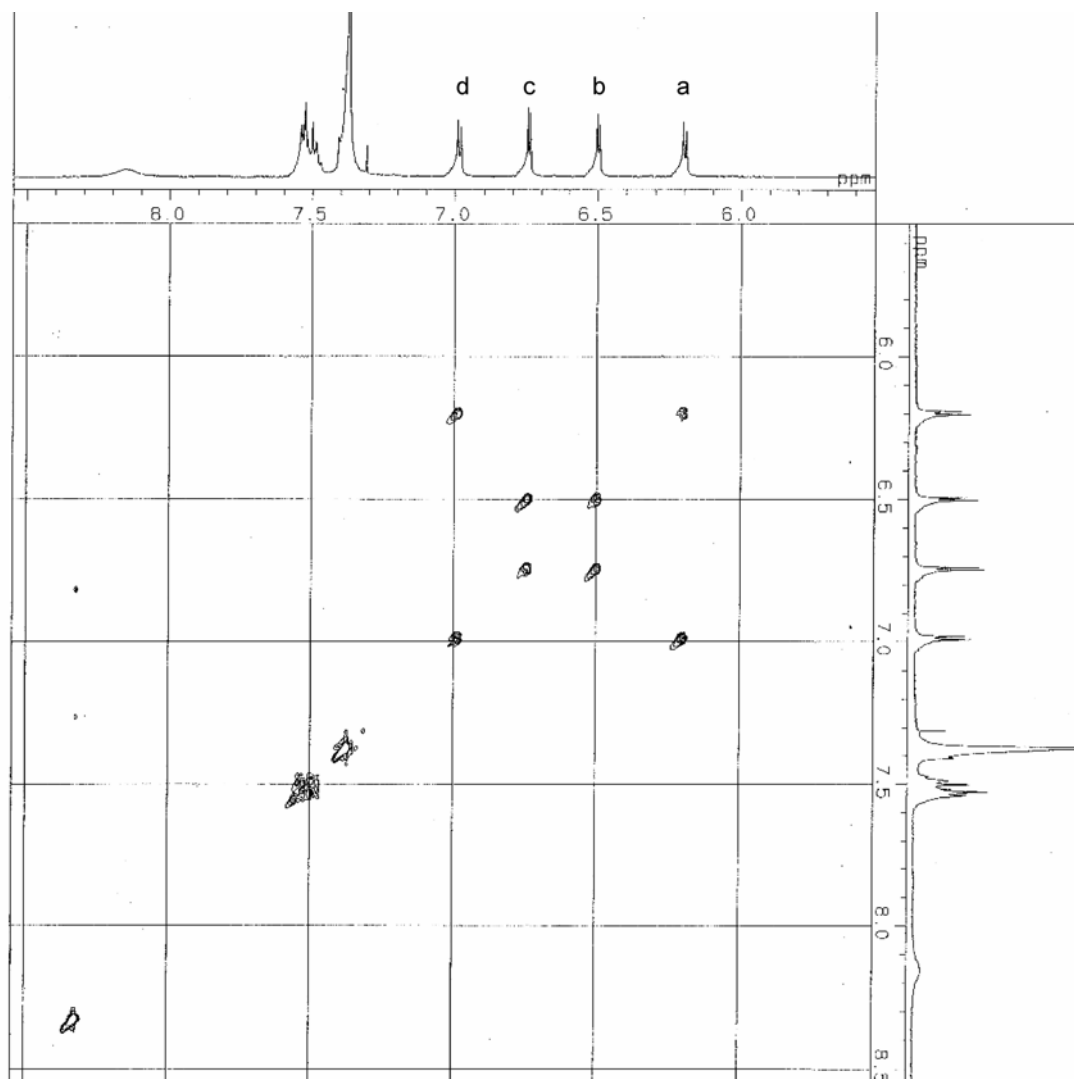

**Figure S6.**  $^1\text{H}$ - $^1\text{H}$  COSY of **3** ( $\text{CD}_2\text{Cl}_2$ )

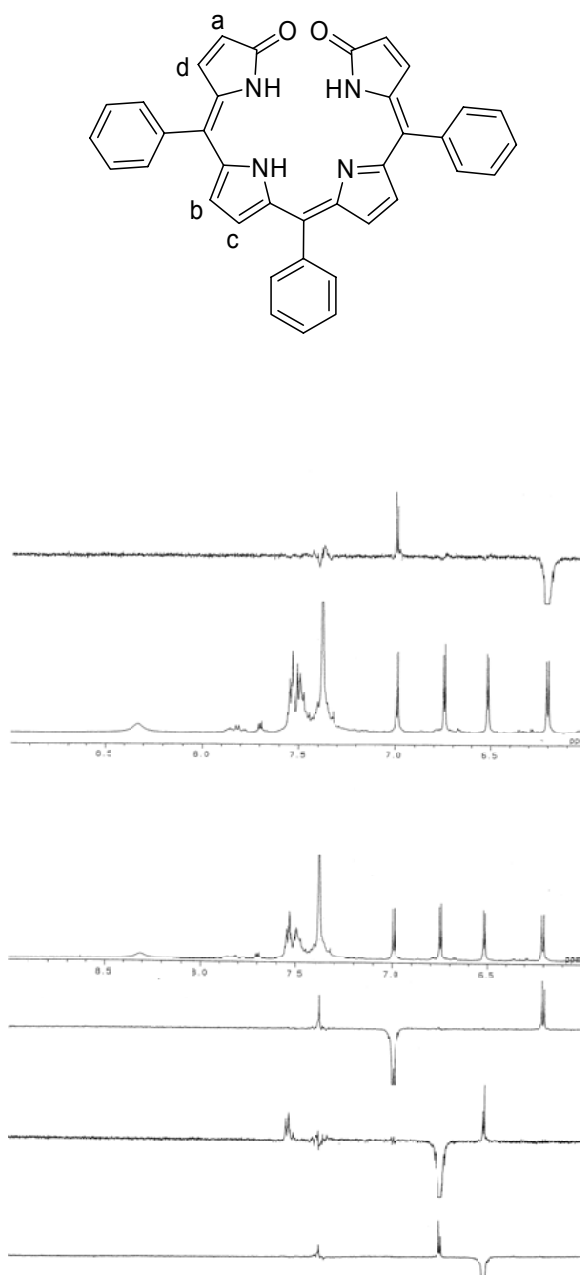

**Figure S7.** NOE of **3** (CD<sub>2</sub>Cl<sub>2</sub>)

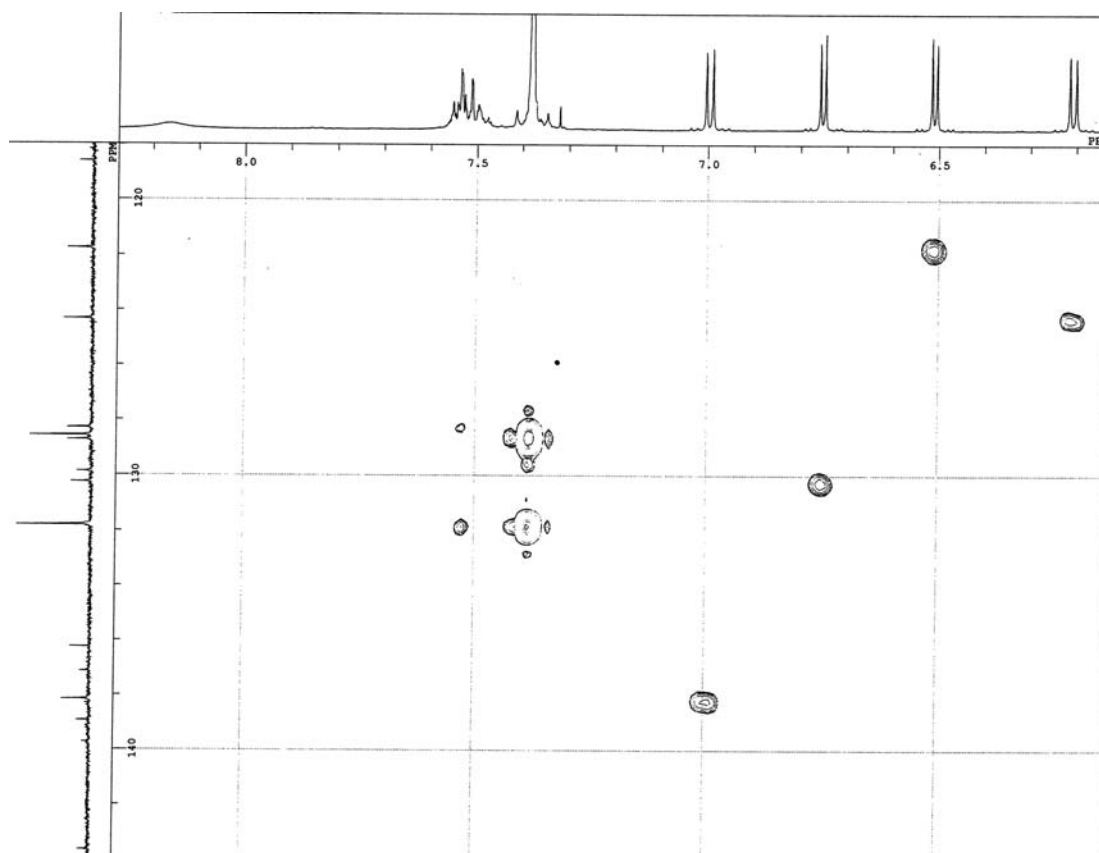

**Figure S8.** HMQC of **3** (CD<sub>2</sub>Cl<sub>2</sub>)

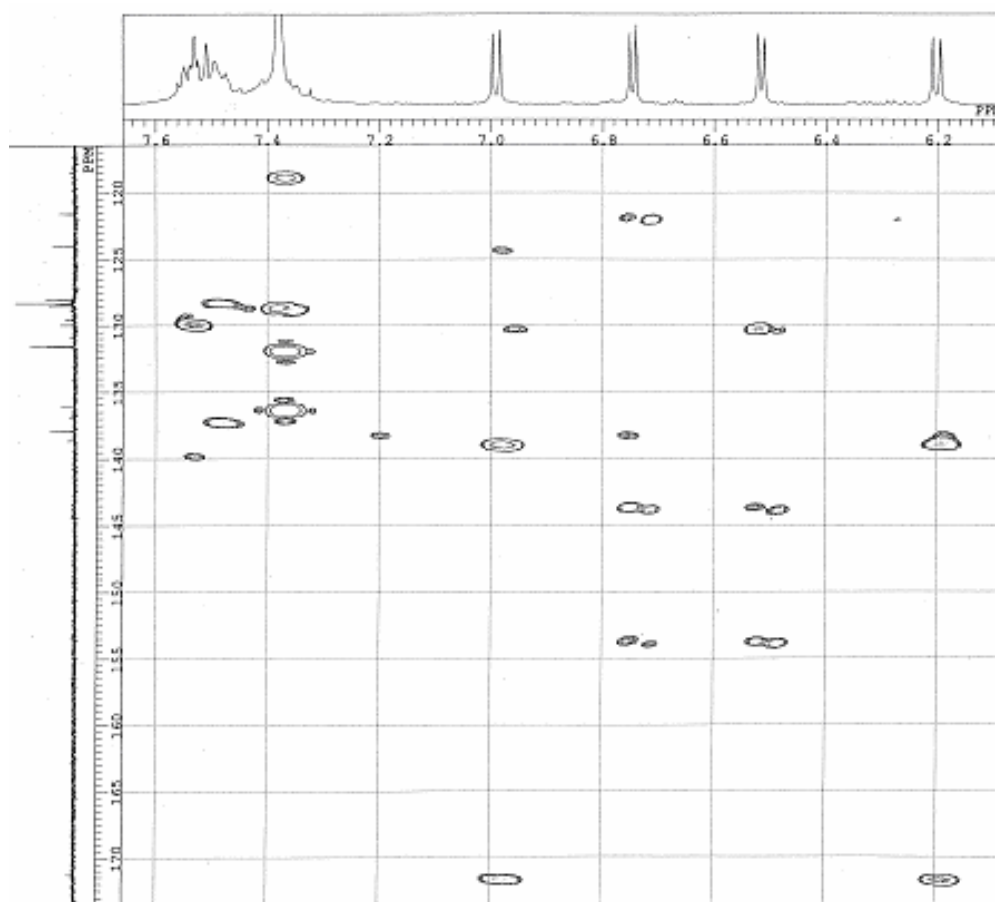

**Figure S9.** HMBC of **3** ( $\text{CD}_2\text{Cl}_2$ ). Both of H-2 and H-3 (at 6.21 and 7.00 ppm) showed correlation with a resonance of the carbonyl C-1 at 171.4 ppm.

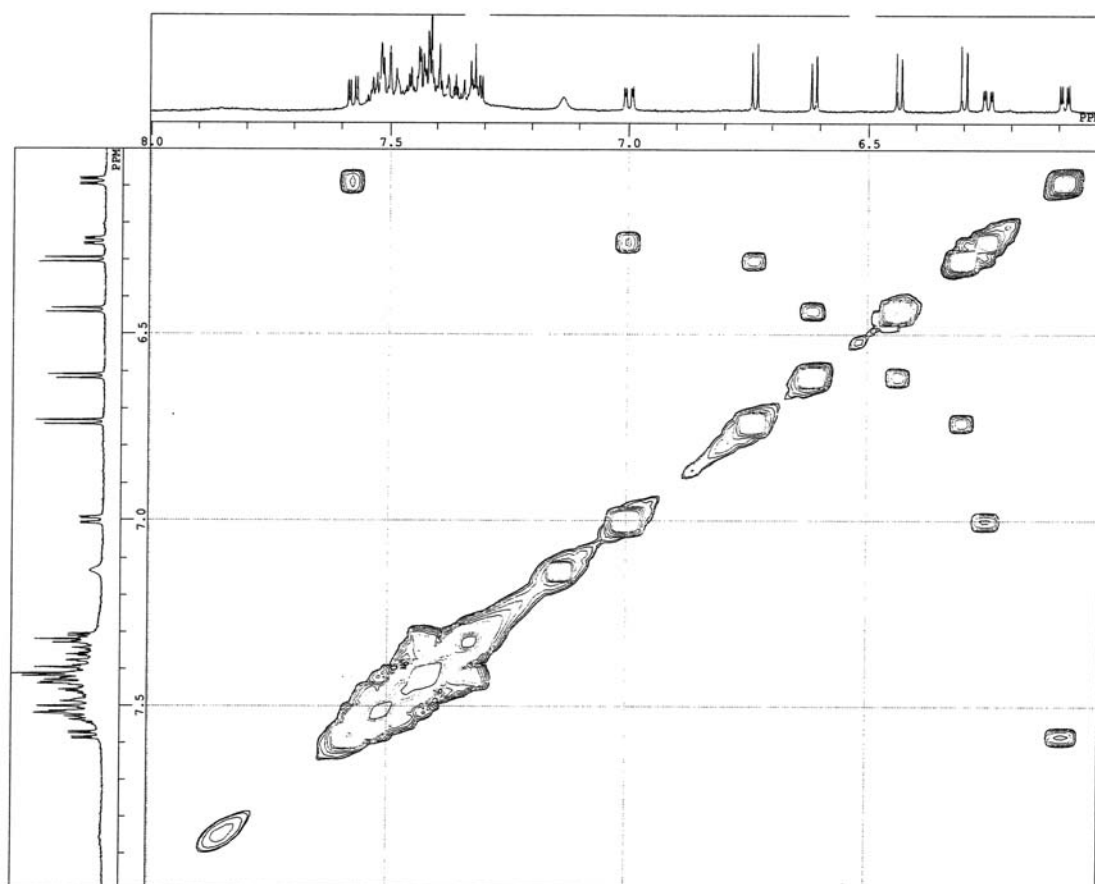

**Figure S10.**  $^1\text{H}$ - $^1\text{H}$  COSY of **4** ( $\text{CD}_2\text{Cl}_2$ )

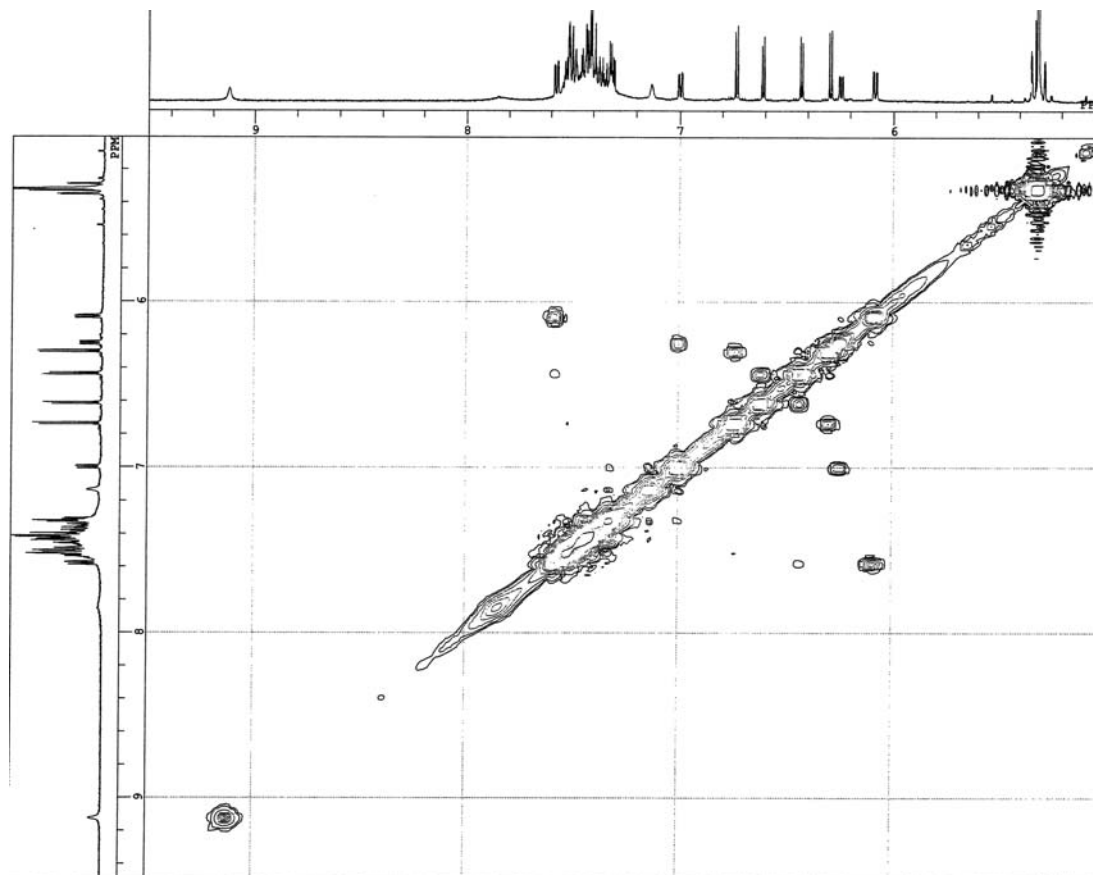

**Figure S11.** NOESY of **4** ( $\text{CD}_2\text{Cl}_2$ ). H-17 at 7.0 ppm showed correlation with the phenyl proton at 7.3 ppm. N-H of the A-ring pyrrole showed correlation with the phenyl proton at 7.3 ppm. No NOE was observed between the phenyl protons and H-2 (6.09 ppm) and H-18 (6.25 ppm). Irradiation of other  $\beta$ -pyrrole protons caused NOE on the phenyl protons.
