# Supplementary material for: A facile and versatile preparation of bilindiones and biladienones from tetraarylporphyrins
Source: Royal Society of Chemistry journal article supplement (doi:10.1039/b414299c), 2005-01-01
Supplement: b414299c-3.pdf [file b414299c-3.pdf]

### Electronic Supplementary Information 3

#### A Facile and Versatile Preparation of Bilindiones and Biladienones from Tetraarylporphyrins

Takae Yamauchi,<sup>a</sup> Tadashi Mizutani,<sup>\*,b</sup> Kenji Wada,<sup>a</sup> Shoji Horii,<sup>b</sup> Hirotaka Furukawa,<sup>a</sup>  
Shigeyuki Masaoka,<sup>a</sup> Ho-Chol Chang,<sup>a</sup> and Susumu Kitagawa<sup>a</sup>

<sup>a</sup> Department of Synthetic Chemistry and Biological Chemistry, Graduate School of Engineering, Kyoto University, Kyotodaigaku-katsura, Nishikyo-ku, Kyoto 615-8510 Japan

<sup>b</sup> Department of Molecular Science and Technology, Faculty of Engineering, Doshisha University, Kyotanabe, Kyoto 610-0321 Japan.

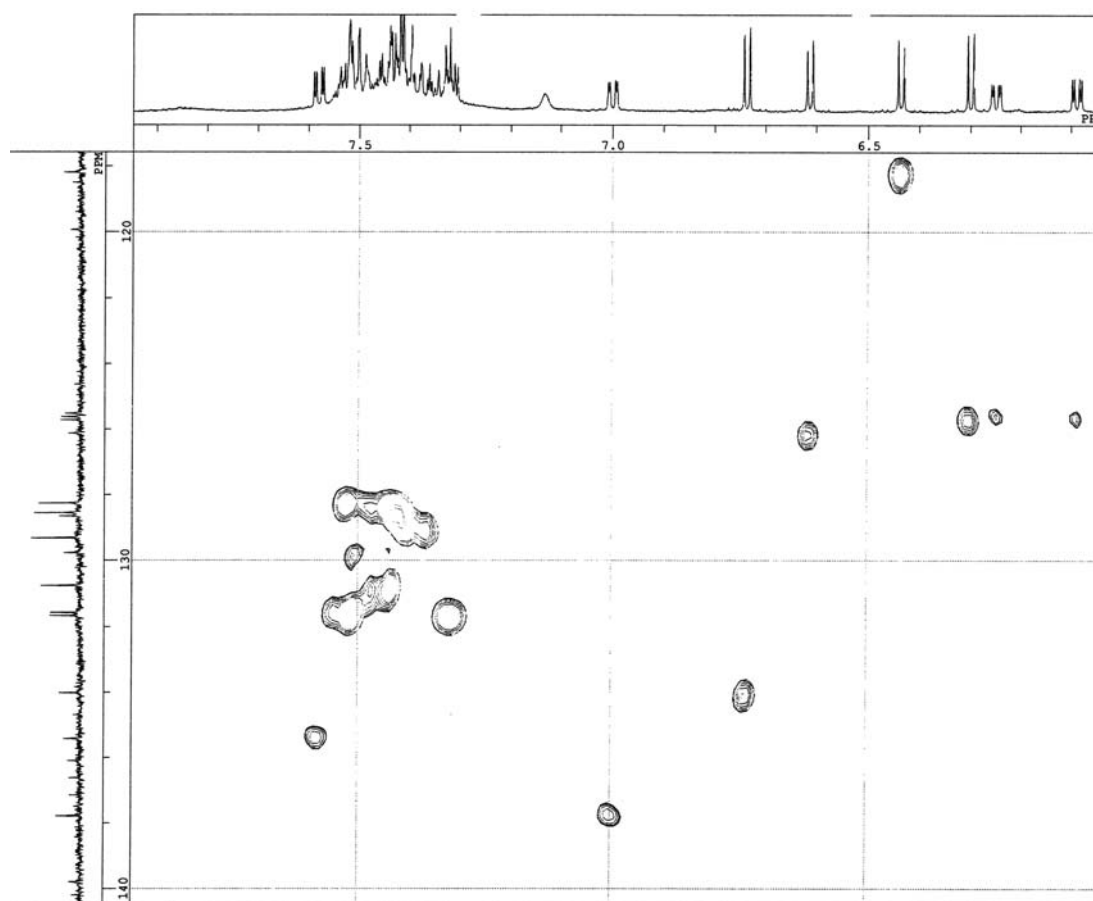

Figure S12. NOESY of **4** (CD<sub>2</sub>Cl<sub>2</sub>). HMQC of **4** (CD<sub>2</sub>Cl<sub>2</sub>)

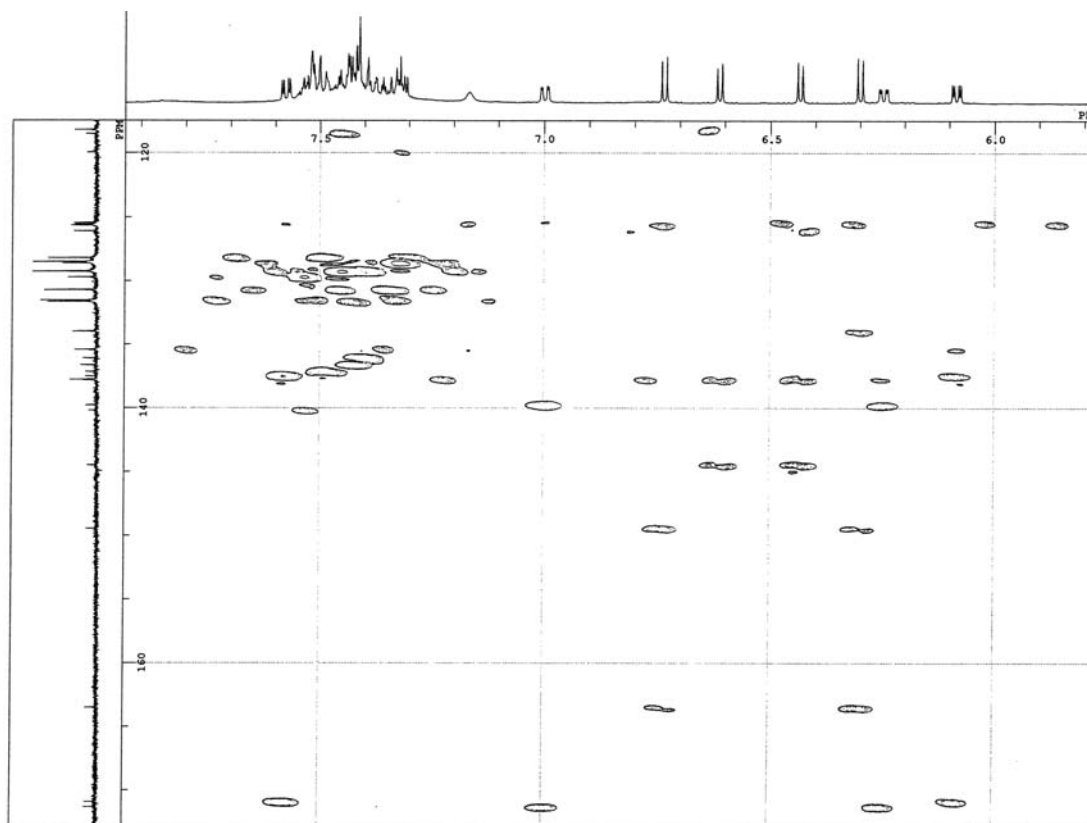

**Figure S13.** HMBC of **4** ( $\text{CD}_2\text{Cl}_2$ ). H-2 and H-3 showed correlation with a carbonyl resonance at 170.9 ppm. Therefore a signal at 170.9 ppm can be assigned to C-1.

H-17 and H-18 showed correlation with a carbonyl resonance at 171.3 ppm. Therefore a signal at 171.3 ppm can be assigned to C-19.

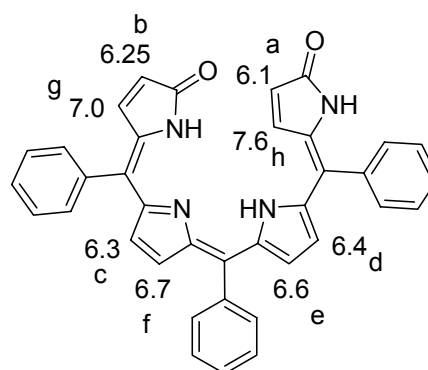

**Table S3.**  $\beta$ -protons and NH protons in the  $^1\text{H}$  NMR spectra of **3** and **4**

| Protons  | $\delta$ , ppm (multiplicity) |                |                                         |
|----------|-------------------------------|----------------|-----------------------------------------|
|          | <b>3</b>                      | <b>4</b>       | $\Delta\delta(\mathbf{3} - \mathbf{4})$ |
| H-2      | 6.21 (d)                      | 6.09 (dd)      | +0.12                                   |
| H-3      | 7.00 (d)                      | 7.58 (dd)      | -0.58                                   |
| H-7      | 6.51 (d)                      | 6.43 (d)       | +0.08                                   |
| H-8      | 6.75 (d)                      | 6.61 (d)       | +0.14                                   |
| H-12     | 6.75 (d)                      | 6.74 (d)       | +0.01                                   |
| H-13     | 6.51 (d)                      | 6.30 (d)       | +0.21                                   |
| H-17     | 7.00 (d)                      | 7.00 (dd)      | 0.00                                    |
| H-18     | 6.21 (d)                      | 6.25 (dd)      | -0.04                                   |
| NH (A)   | 8.14                          | 7.10           | +1.04                                   |
| NH (D)   | 8.14                          | 9.11           | -0.97                                   |
|          |                               | (NOE with H-3) |                                         |
| NH (B+C) | 12.0                          | 12.35          | -0.35                                   |

**Table S4.** C-13 signals assigned by HMQC of **3** and **4**

| Protons | $\delta$ , ppm (multiplicity) |          |                                         |
|---------|-------------------------------|----------|-----------------------------------------|
|         | <b>3</b>                      | <b>4</b> | $\Delta\delta(\mathbf{3} - \mathbf{4})$ |
| C-1     | 171.4                         | 171.3    | +0.1                                    |
| C-2     | 124.4                         | 125.6    | -1.2                                    |
| C-3     | 138.2                         | 135.4    | +2.8                                    |
| C-4     | 138.9                         | 137.5    | +1.4                                    |
| C-6     | 153.8                         | 144.5    | +9.3                                    |
| C-7     | 121.8                         | 118.2    | +3.6                                    |
| C-8     | 130.3                         | 126.1    | +4.2                                    |
| C-9     | 143.7                         | 137.8    | +5.9                                    |
| C-11    | 143.7                         | 149.5    | -5.8                                    |
| C-12    | 130.3                         | 134.0    | -3.7                                    |
| C-13    | 121.8                         | 125.7    | -3.9                                    |
| C-14    | 153.8                         | 163.5    | -9.7                                    |
| C-16    | 138.9                         | 139.8    | -0.9                                    |
| C-17    | 138.2                         | 137.8    | +0.4                                    |
| C-18    | 124.4                         | 125.5    | -1.1                                    |
| C-19    | 171.4                         | 170.9    | +0.5                                    |

C-5, C-10 and C-15 carbons were not assigned since no correlation was observed for these signals in the HMBC spectrum.

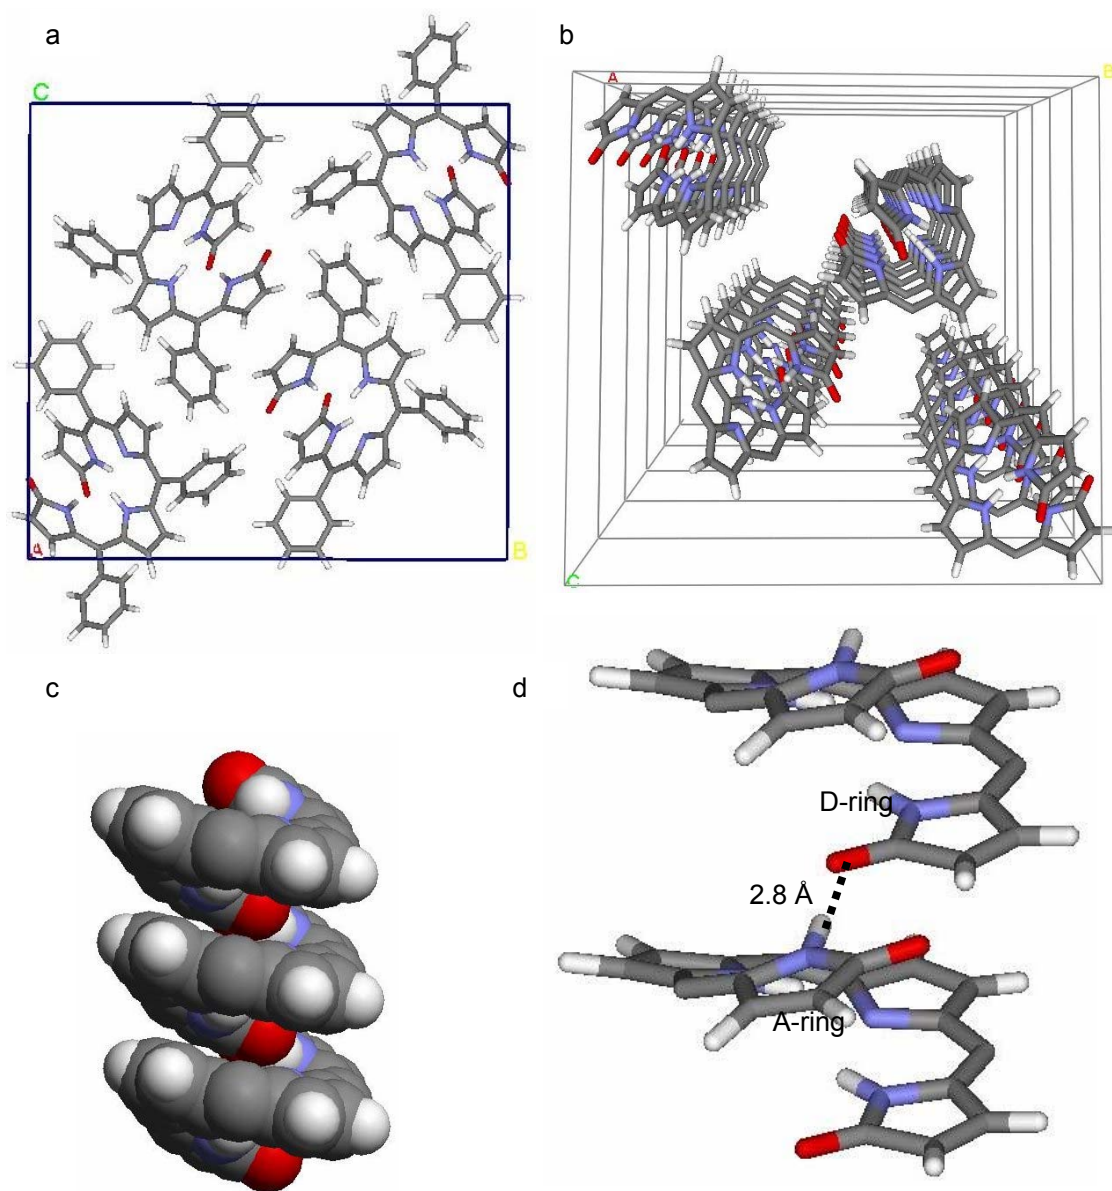

**Figure S14.** (a) Unit cell packing for **3**. The view is drawn looking down the *a*-axis. (b) Perspective view of **3** along the *a*-axis. (c) Structure of spiral column made up of helical molecule. (d) A dotted line indicates the intermolecular hydrogen bond. The distance between the nitrogen atom of the A ring and the oxygen atom of the carbonyl group of the D ring of the adjacent molecule is 2.8 Å. Except for (a), the phenyl groups are omitted for clarity.

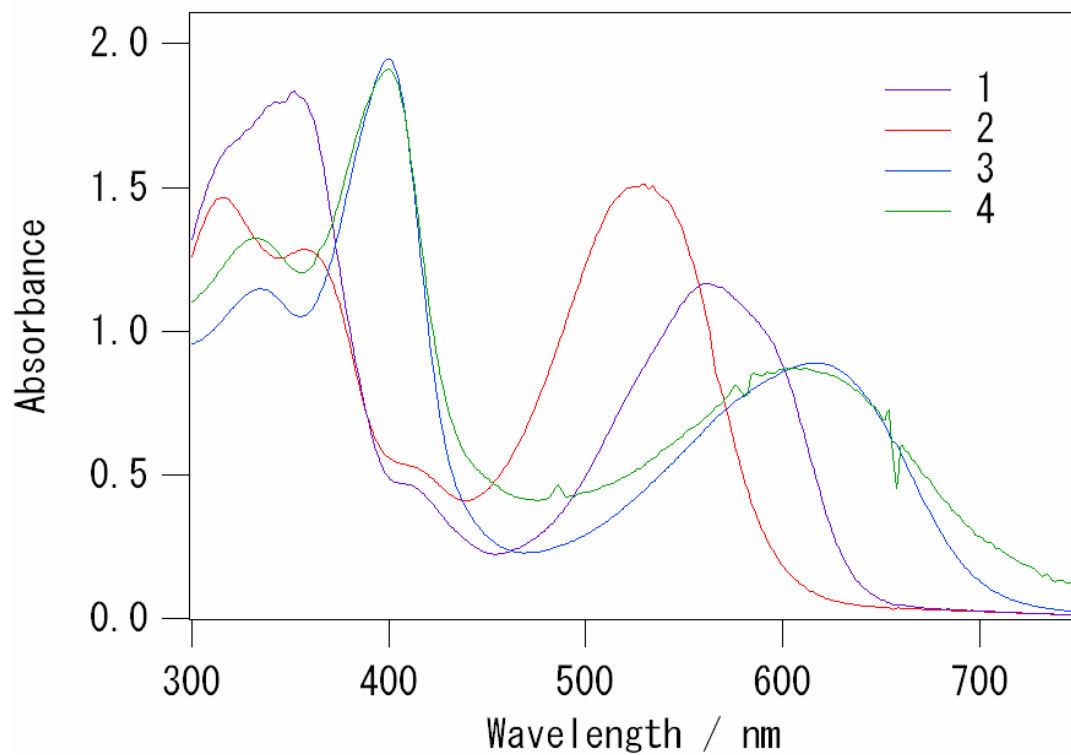

**Figure S15.** UV-visible absorption spectra of **1-4** in  $\text{CHCl}_3$ .
